# Supplementary material for: Extent of investigation and management of cases of ‘unexplained’ mismatch repair deficiency (u-dMMR): a UK Cancer Genetics Group consensus
Source: HighWire-hosted journal article supplement (doi:10.1136/jmg-2024-109886), 2024-03-26
Supplement: jmg-2024-109886supp001_data_supplement.pdf [file jmg-2024-109886supp001_data_supplement.pdf]

## Supplementary information

### Supplementary tables

| Total valid responses= 36 | Reflex testing i.e. all cases | At request of treating team | At request of treating team OR if Lynch Syndrome suspected | If Lynch Syndrome suspected | No assessment for this tumour type | After MDT discussion | I'm not sure | Missing/not applicable |
|---------------------------|-------------------------------|-----------------------------|------------------------------------------------------------|-----------------------------|------------------------------------|----------------------|--------------|------------------------|
| Colorectal                | 35                            | 0                           | 1                                                          | 0                           | 0                                  | 0                    | 0            | 5                      |
| Endometrial               | 33                            | 0                           | 1                                                          | 0                           | 0                                  | 1                    | 1            | 5                      |
| Urinary Tract             | 4                             | 4                           | 7                                                          | 6                           | 3                                  | 1                    | 11           | 5                      |
| Sebaceous Neoplasia       | 6                             | 3                           | 3                                                          | 6                           | 3                                  | 1                    | 14           | 5                      |
| Oesophageal               | 4                             | 5                           | 2                                                          | 2                           | 11                                 | 3                    | 8            | 6                      |
| Gastric                   | 5                             | 5                           | 5                                                          | 5                           | 3                                  | 13                   | 0            | 5                      |
| Biliary Tract             | 1                             | 5                           | 8                                                          | 6                           | 3                                  | 2                    | 11           | 5                      |
| Pancreatic                | 1                             | 5                           | 9                                                          | 5                           | 3                                  | 3                    | 10           | 5                      |
| Brain                     | 0                             | 4                           | 7                                                          | 4                           | 6                                  | 1                    | 14           | 5                      |

*Supplementary Table 1: Responses to pre-meeting survey question - "what are the indications for assessment of MMR in the following tumour types?" n=36 valid (non-blank) responses*

## Supplementary figures

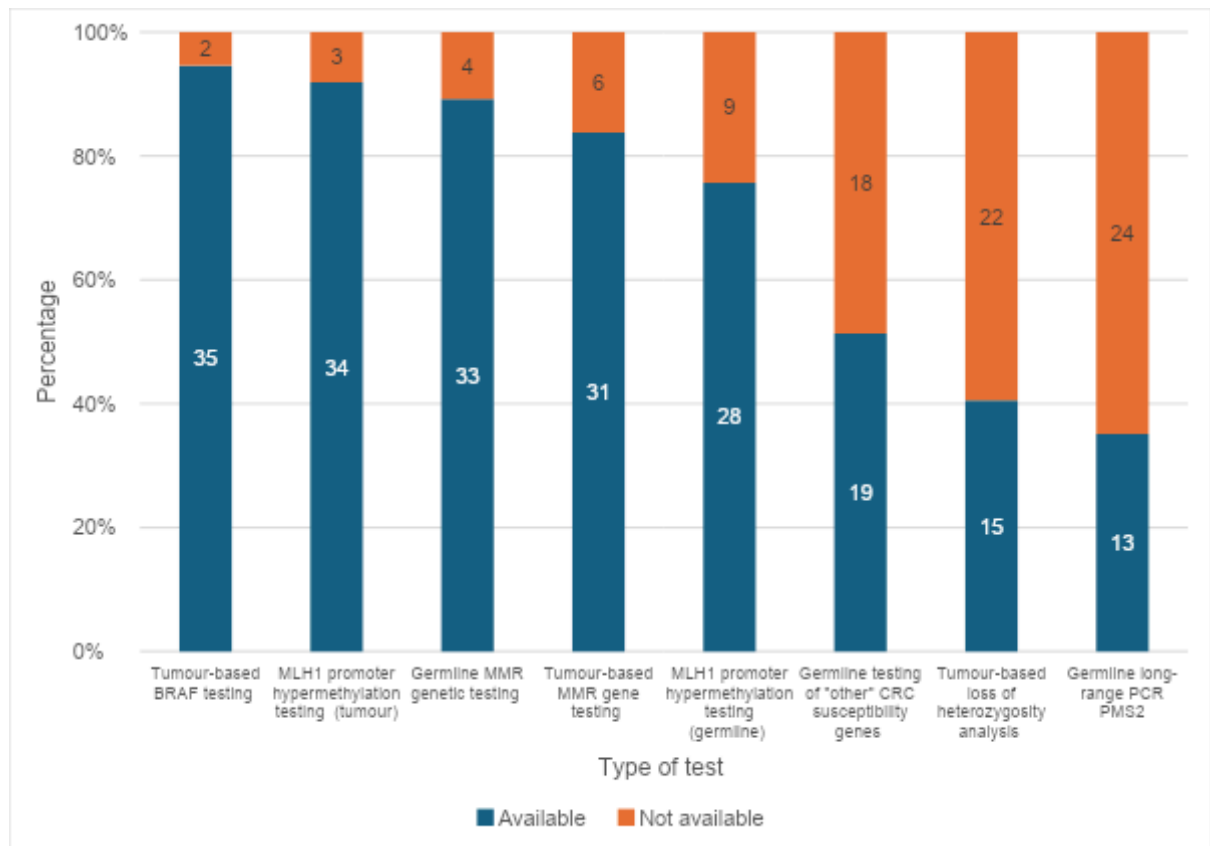

Supplementary Figure 1: Responses to pre-meeting survey question "Which of the following tests are available in your institution"? n=37 valid responses

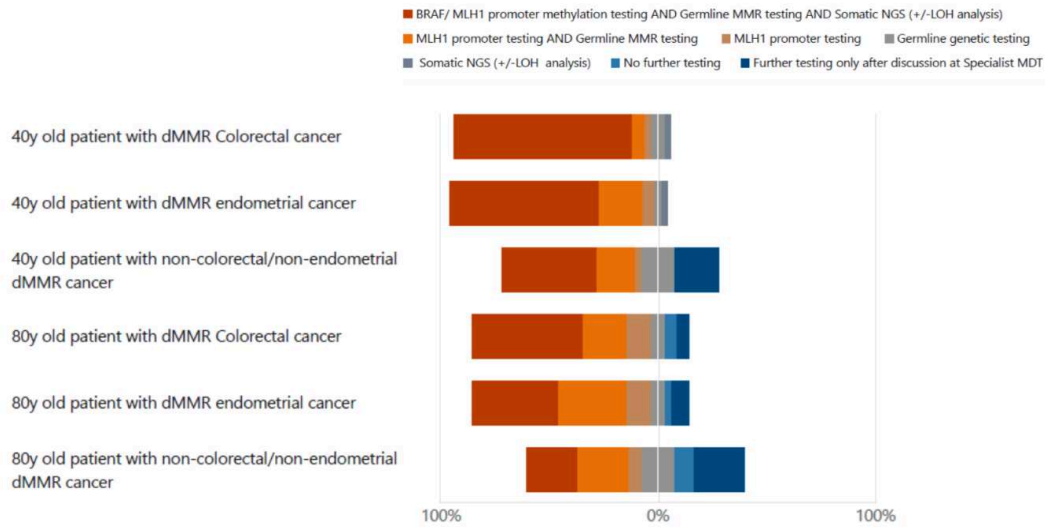

Supplementary Figure 2: Responses to pre-meeting survey question “what is the extent of investigation in a proband with MLH1/PMS2 deficient tumour where germline genetic testing is uninformative” (35 valid responses)?

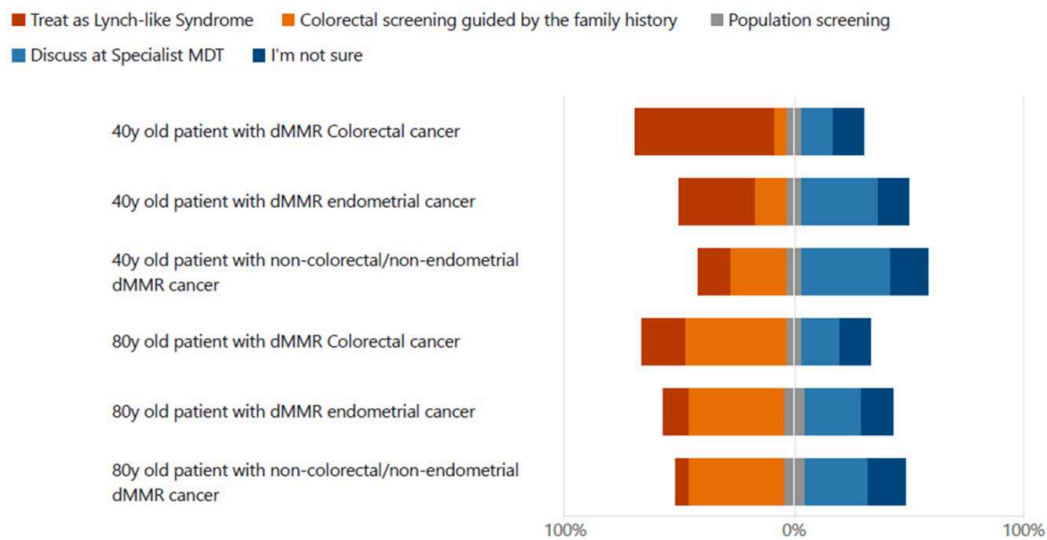

Supplementary Figure 3: Responses to pre-meeting survey question “What bowel screening do you recommend for relatives of a proband with MLH1/PMS2 deficient tumour where germline genetic testing is uninformative”? (n=37 valid responses)
