# Supplementary material for: Extent of investigation and management of cases of ‘unexplained’ mismatch repair deficiency (u-dMMR): a UK Cancer Genetics Group consensus
Source: PubMed Central journal article supplement — J Med Genet. 2024 Mar 26;61(7):707–15. doi: 10.1136/jmg-2024-109886 (PMC11228216; doi:10.1136/jmg-2024-109886), 2024-03-26
Supplement: jmg-2024-109886supp002.pdf [file jmg-2024-109886supp002.pdf]

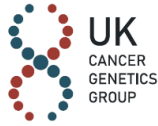

## UKCGG Consensus Meeting 25<sup>th</sup> April 2023 Unexplained dMMR

***Via zoom, if you have not received a joining link, please register at***

<https://us06web.zoom.us/meeting/register/tZcpf-qhrzwiG91MhI4OP5w8tHEVeVBjhDDy>

### ***9.30 – 11.15    Introductory talks***

- 9.30 -9.40**      Introduction and Housekeeping – Dr Helen Hanson
- 9.45 -9.55**      Background to concept of Lynch Like Syndrome – Dr Kevin Monahan
- 9.55-10.10**    Assessment of MMR – technical considerations - Dr Nick West
- 10.10-10.25**    Assessment of MMR in endometrial cancer -Mr Neil Ryan (pre-recorded)
- 10.25 – 10.40**    Assessment of MMR/MSI (Urothelial cancers as example) -Professor Sir John Burn
- 10.40 – 10.55**    Assessment of MMR in gastric cancer – Dr Wei Cope
- 10.55 – 11.05**    Feedback from National MDT - Dr Jennie Murray
- 11.05-11.15**    Feedback on premeeting survey -Dr Terri McVeigh

### ***11.15-11.30    Break***

***11.30 – 13.30    Discussion and poll session: Please join slido via the link or QR code below***

<https://app.sli.do/event/uDYQHPWz9FYccb9eMdi2h8>

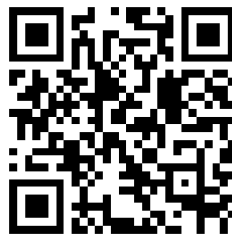

***13.30 Meeting close***
